# Supplementary material for: A cancer vaccine-mediated postoperative immunotherapy for recurrent and metastatic tumors
Source: PubMed Central journal article supplement (PMC5906566; doi:10.1038/s41467-018-03915-4), 2018-04-18
Supplement: 41467_2018_3915_MOESM1_ESM.pdf [file 41467_2018_3915_MOESM1_ESM.pdf]

## **Supplementary Information**

*Wang et al.* A cancer vaccine-mediated postoperative immunotherapy for recurrent and metastatic tumors.

## Table of Contents

|                          |         |
|--------------------------|---------|
| Supplementary Figure 1.  | Page 3  |
| Supplementary Figure 2.  | Page 4  |
| Supplementary Figure 3.  | Page 5  |
| Supplementary Figure 4.  | Page 6  |
| Supplementary Figure 5.  | Page 7  |
| Supplementary Figure 6.  | Page 8  |
| Supplementary Figure 7.  | Page 9  |
| Supplementary Figure 8.  | Page 10 |
| Supplementary Figure 9.  | Page 11 |
| Supplementary Figure 10. | Page 12 |
| Supplementary Figure 11. | Page 13 |
| Supplementary Figure 12. | Page 14 |
| Supplementary Figure 13. | Page 15 |
| Supplementary Figure 14. | Page 16 |
| Supplementary Figure 15. | Page 17 |
| Supplementary Figure 16. | Page 18 |
| Supplementary Figure 17. | Page 19 |
| Supplementary Figure 18. | Page 20 |
| Supplementary Figure 19. | Page 21 |
| Supplementary Figure 20. | Page 22 |
| Supplementary Figure 21. | Page 23 |
| Supplementary Figure 22. | Page 24 |

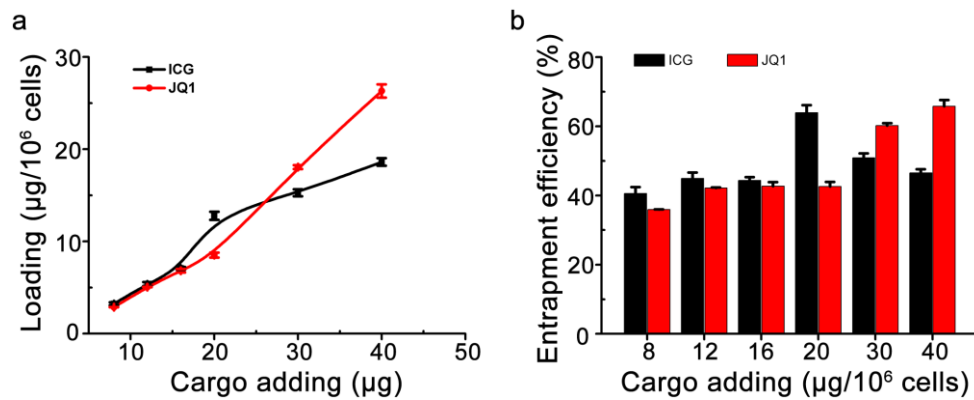

**Supplementary Figure 1. Drug loading and encapsulation efficiency of inactivated 4T1 tumor cells.** (a) ICG and JQ1 loading ratios, and (b) encapsulation efficiency in 4T1 cells.

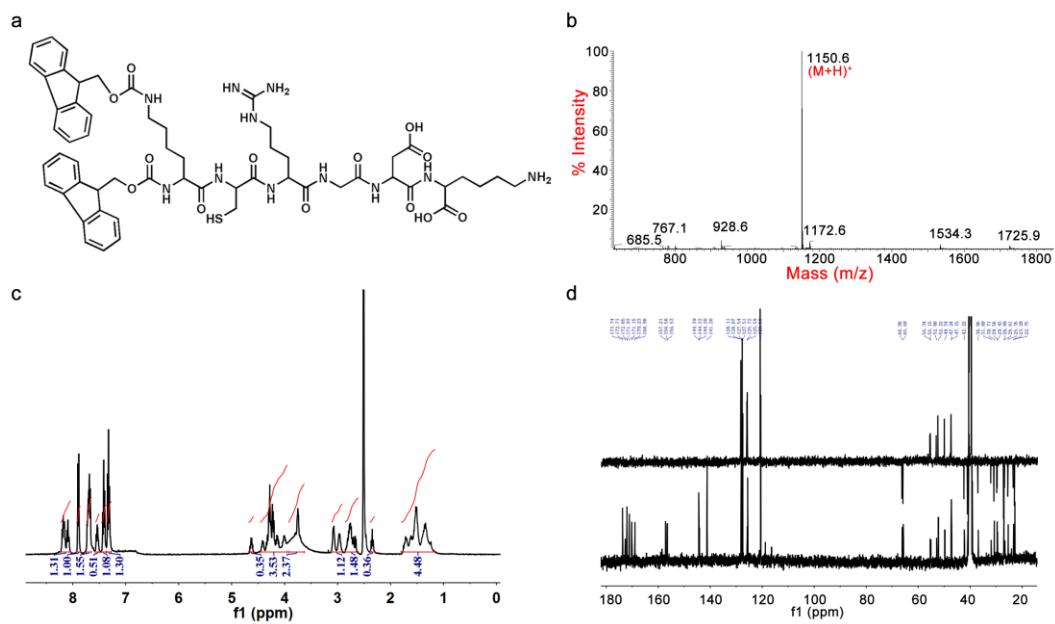

**Supplementary Figure 2. Structural confirmation of Fmoc-KCRGDK (FK) peptide.** (a) Chemical structure, (b) Mass spectra, (c) <sup>1</sup>H-NMR, and (d) <sup>13</sup>C-NMR of FK peptide.

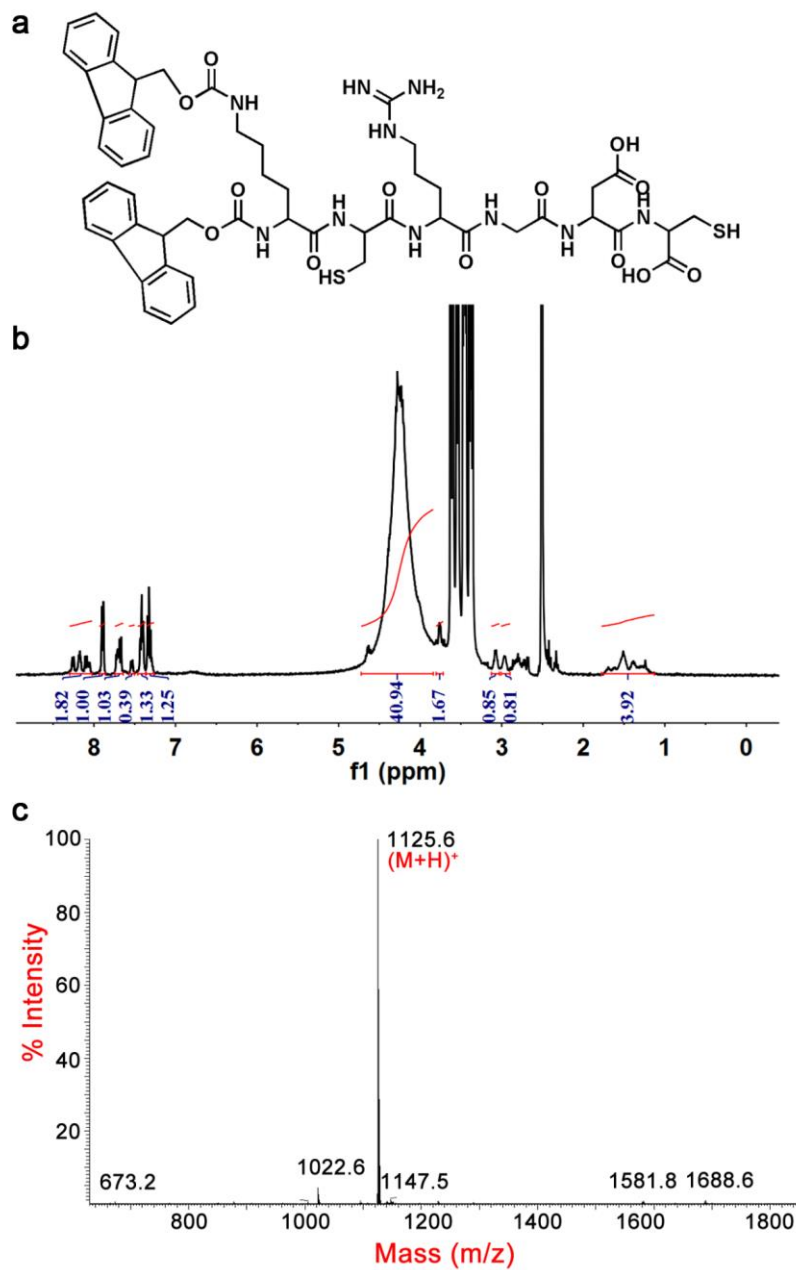

**Supplementary Figure 3. Structural confirmation of Fmoc-KCRGDC (FC) peptide.** (a) Chemical structure, (b)  $^1\text{H}$ -NMR, and (c) Mass spectra of FC peptide.

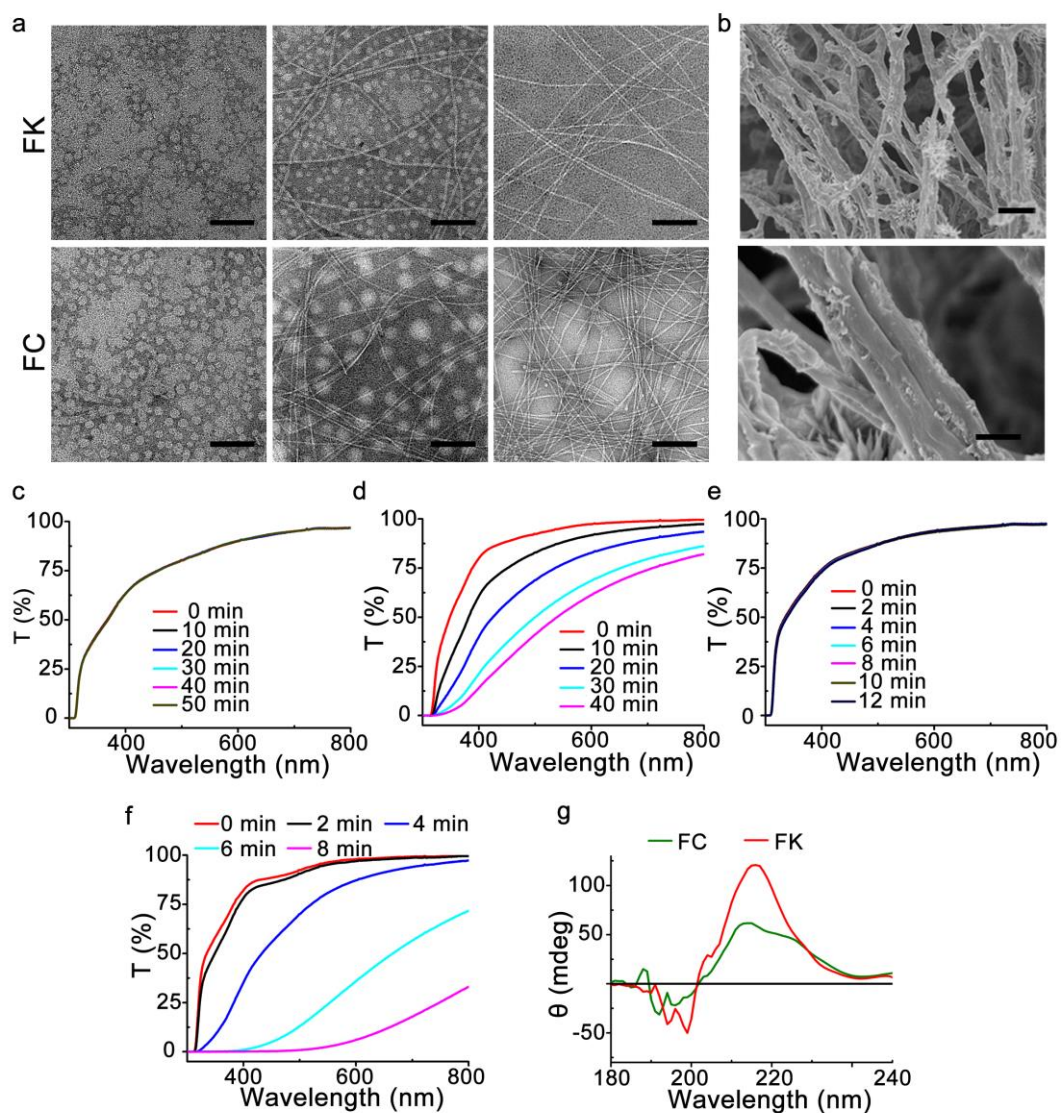

**Supplementary Figure 4. Physical characterization of gelation process of the hydrogel matrix.** (a) TEM images of FK and FC micelles and hydrogels examined before, under and after incubation at 70 °C (Scale bars, 50 nm). (b) SEM images of FK hydrogel (Scale bars, up: 2 μm; bottom: 500 nm). (c) Optical transmittance of FC hydrogel examined post the predetermined time durations at 25 or (d) 70 °C. (e) Optical transmittance of FK examined post the predetermined time durations at 25 °C or (f) 70 °C. (g) CD spectra of FK and FC hydrogels examined at a concentration of 0.5 mg/mL.

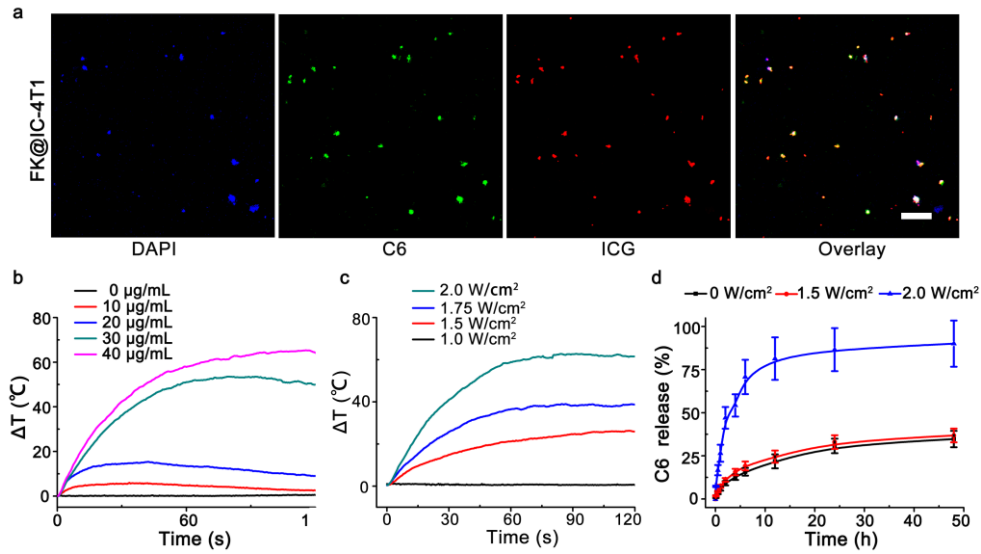

**Supplementary Figure 5. Characterization of the tumor cell-loaded hydrogel matrix.** (a) The confocal laser scanning microscopy images of FK hydrogels (0.5 % w/w) loaded with IC-4T1 ( $100 \mu\text{L}/2 \times 10^6$  cells, red: ICG, green: C6, blue: the nucleus) (Scale bar, 100  $\mu\text{m}$ ). Photothermal effects of FK@IQ-4T1 as a function of (b) ICG concentration (photo density: 2.0  $\text{W}/\text{cm}^2$ ), or (c) Photo density (ICG concentration: 30  $\mu\text{g}/\text{mL}$ ); (d) Laser-triggered C6 release from FK@IC-4T1. Data represent means  $\pm$  s.d. (n=3).

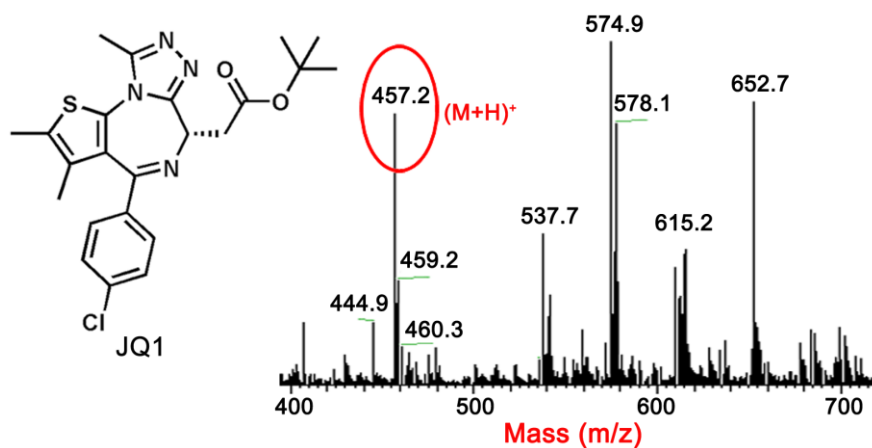

**Supplementary Figure 6.** Mass spectra of JQ1 released from FK@IQ-4T1 upon 808 nm laser irradiation.



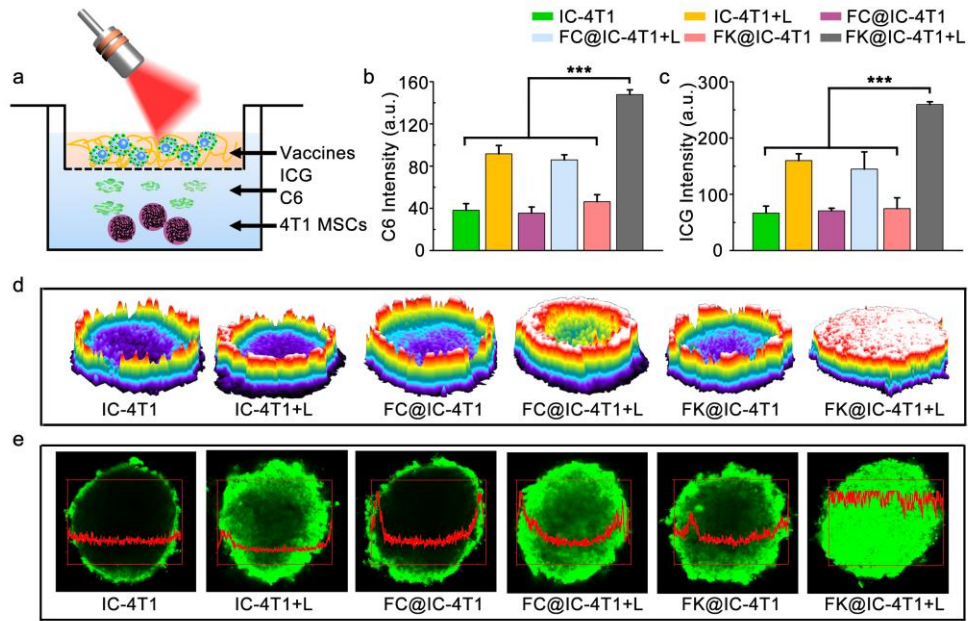

**Supplementary Figure 7. Tumor penetrating capability of PVAX in 4T1 tumor cell-derived multicellular spheroid (MCS) model.** (a) A schematic diagram illustrating the co-culture system with culture inserts. (b) Flow cytometry of intracellular accumulation of C6, and (c) ICG in 4T1 MCSs model. (d) 2.5-D CLSM images of FK@IC-4T1 distribution in 4T1 MCSs examined 12 h post vaccine incubation and laser irradiation. (e) CLSM images and fluorescence intensity profile of C6 examined at Z-axis of 150  $\mu\text{m}$ . The significance of differences was evaluated by one-way ANOVA \*\*\*  $p < 0.01$ . Data represent means  $\pm$  s.d. (n=3).

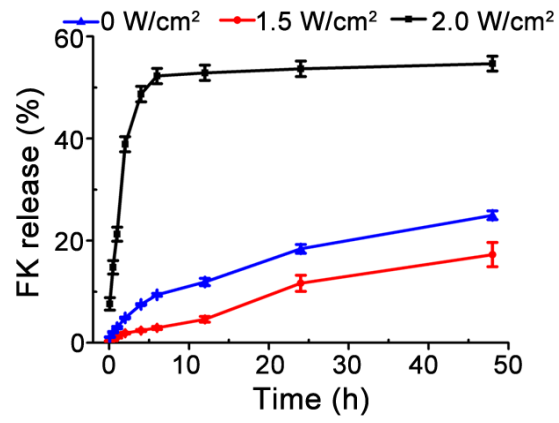

**Supplementary Figure 8.** Laser-triggered FK release profile from the hydrogel as a function of photodensity. Data represent means  $\pm$  s.d. (n=3).

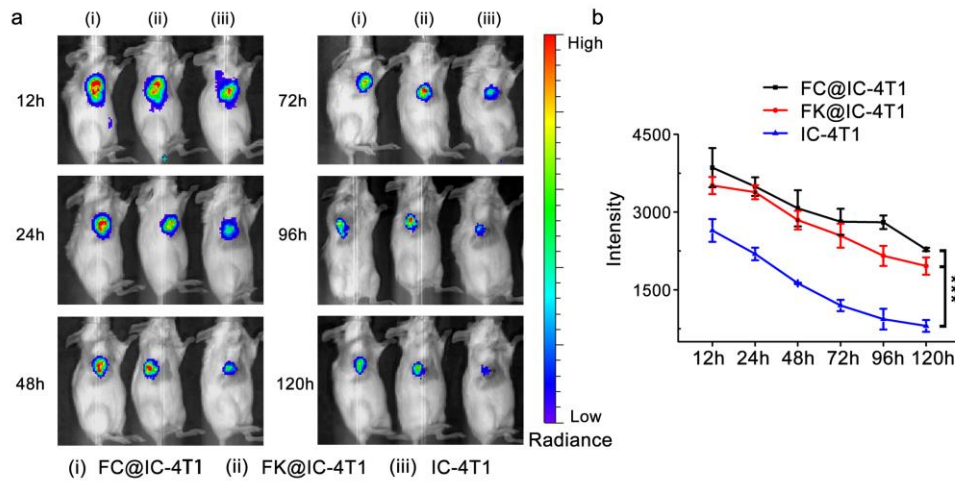

**Supplementary Figure 9. Tumor accumulation and retention capability of PVAX *in vivo*.** (a) Fluorescence examination of the intratumoral accumulation and retention of the intratumorally injected cancer vaccines *in vivo*. (b) Normalized ICG fluorescence intensity of intratumorally injected FK@IC-4T1 vaccine as a function of injection time. The fluorescence imaging *in vivo* was performed using ICG (Ex = 710 nm, Em = 780 nm). The significance of differences was analyzed by Unpaired student's *t*-test (two-tailed) \*\*\*  $p < 0.01$ . Data represent means  $\pm$  s.d. (n=3).

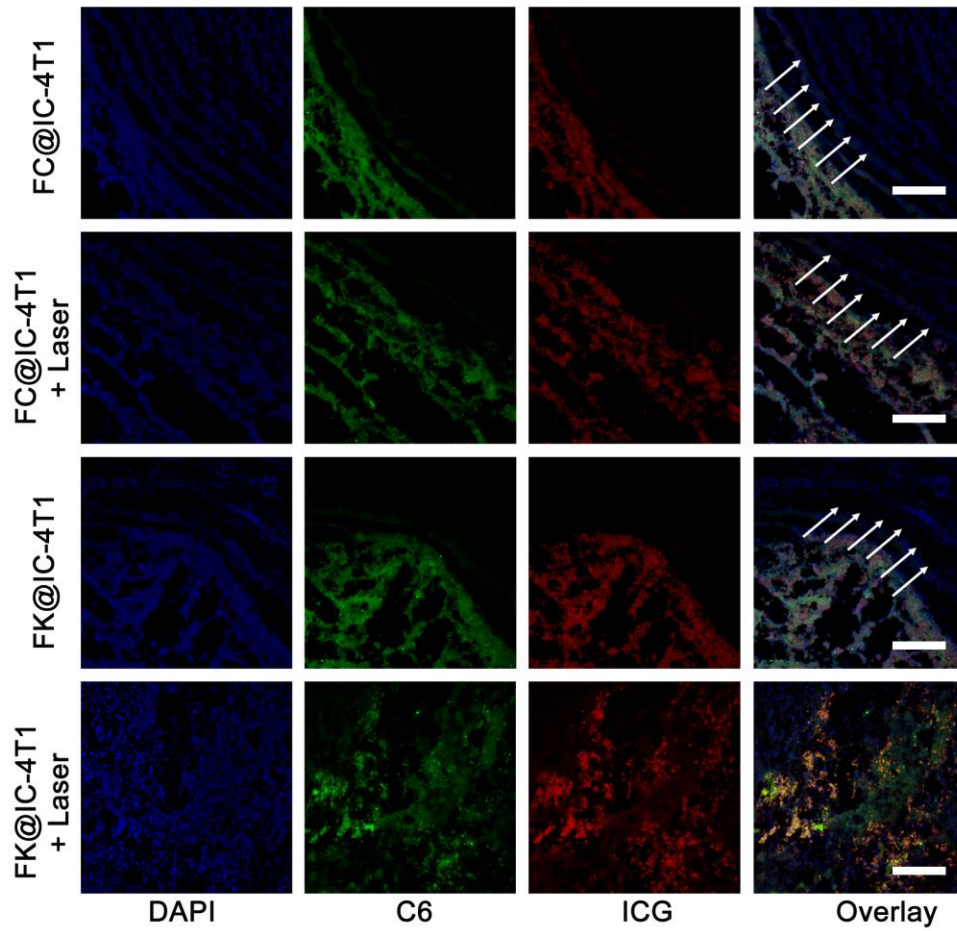

**Supplementary Figure 10.** CLSM examination of intratumoral penetration of ICG and C6 co-loaded FK or FC hydrogel in 4T1 tumor xenografts (the white arrows indicated the tumor burden restricting the penetration of vaccines (Scale bars = 400  $\mu\text{m}$ )).

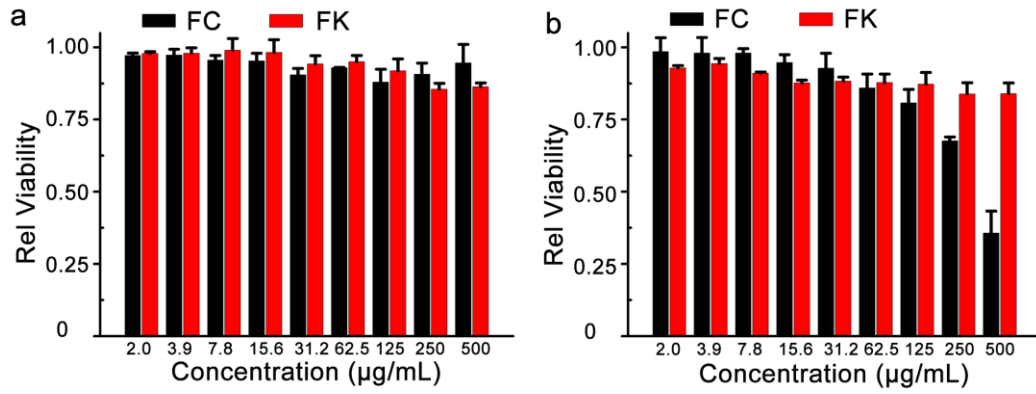

**Supplementary Figure 11. Cytotoxicity assay of FK and FC hydrogels *in vitro*.**

The biocompatibility of FK and FC hydrogels in (a) RAW 264.7, and (b) BMDCs examined using SRB assay post 48 h incubation.

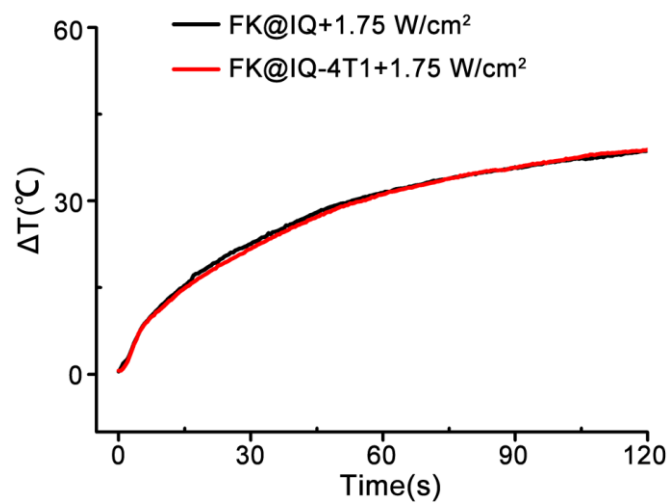

**Supplementary Figure 12.** FK-IQ and FK@IQ-4T1 induced comparable photothermal effects *in vitro* at an ICG concentration of 30  $\mu\text{g/mL}$  upon 808 nm laser irradiation for 2 min.

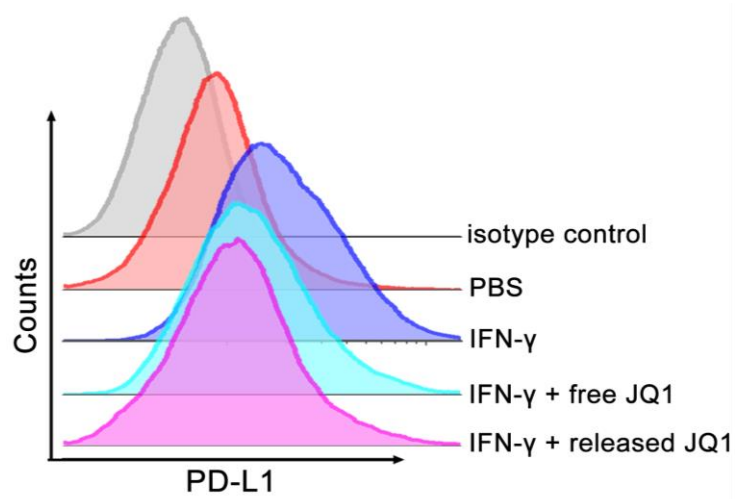

**Supplementary Figure 13.** Flow cytometric analysis of JQ1-induced downregulation of PD-L1 on the membrane of 4T1 cells (INF- $\gamma$ : 20 nM; JQ1: 200 nM).

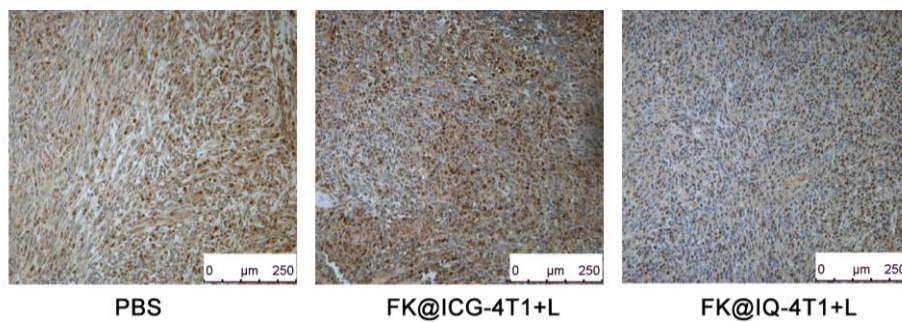

**Supplementary Figure 14.** Immunohistochemical assay of PD-L1 expression in 4T1 tumors examined at the end of the anti-recurrence study shown in Fig. 4a.



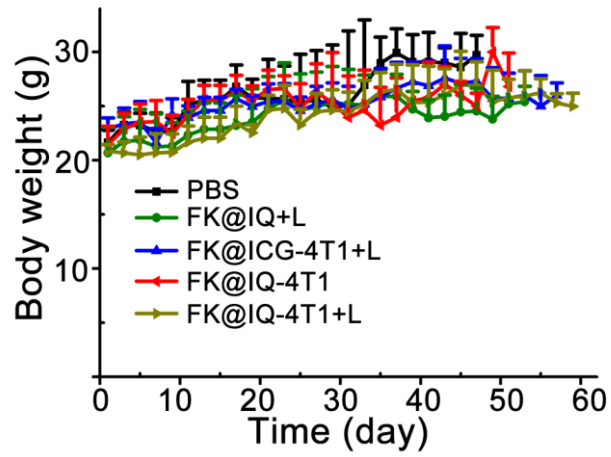

**Supplementary Figure 15.** Body weight change of the 4T1 tumor bearing mice recorded during the anti-recurrence study according to the treatment schedule shown in Fig. 4a.

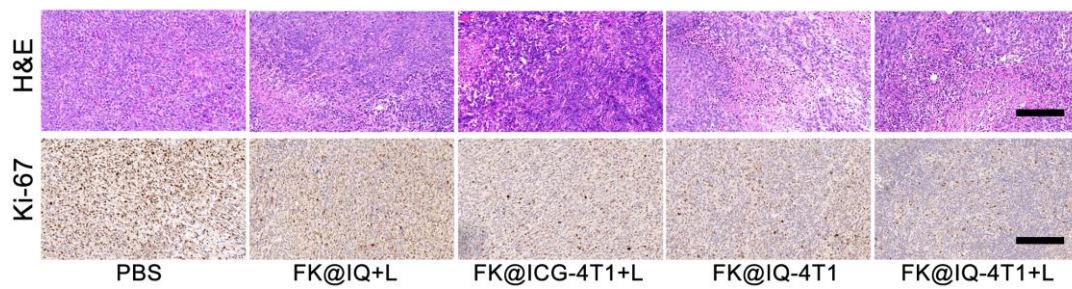

**Supplementary Figure 16.** H&E and Ki-67 staining of the 4T1 tumor sections at the end of anti-recurrence study using the autologous tumor model according to the treatment schedule shown in Fig. 4a (Scale bars = 200  $\mu$ m).

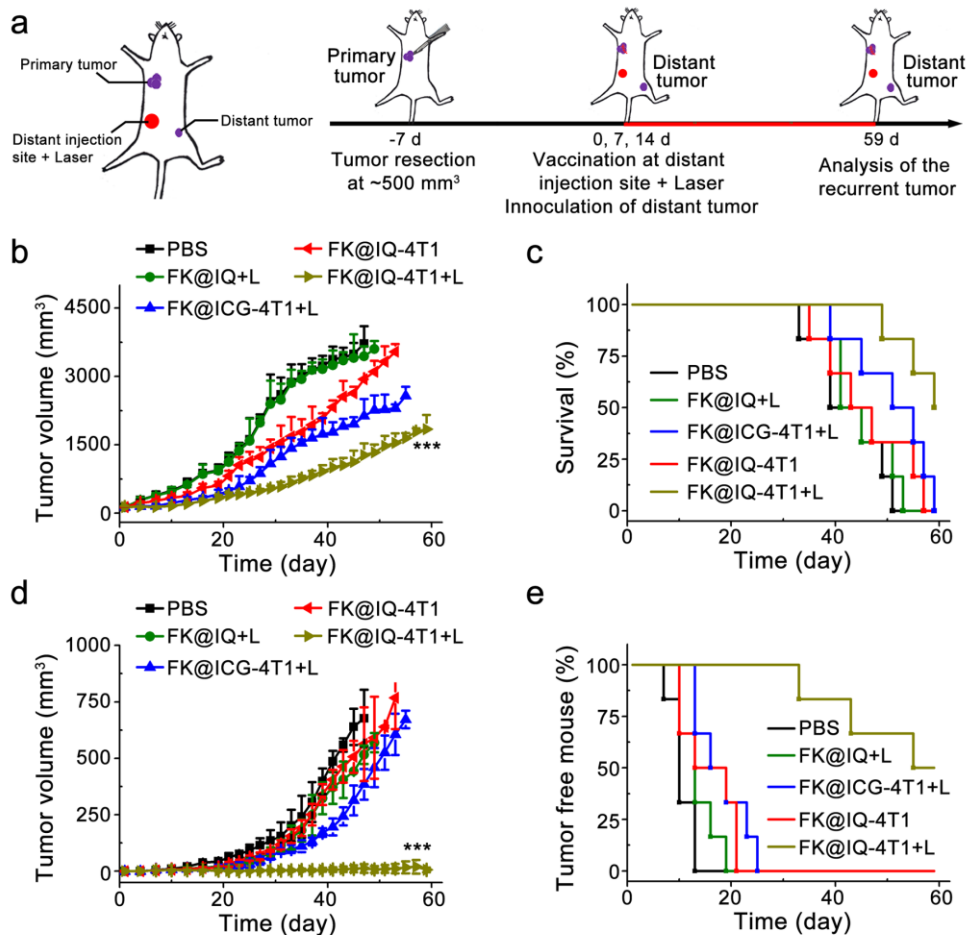

**Supplementary Figure 17. PVAX-performed immunotherapy for recurrent and metastatic 4T1 tumor xenografts *in vivo*.** (a) Treatment schedule for the immunotherapy; (b) Average tumor growth curves of the recurrent tumors receiving different treatments at the distant sites, laser irradiation for 2 min at photodensity of 2.0 W/cm<sup>2</sup>. The mean tumor volumes were analyzed using one-way ANOVA. \*\*\* p < 0.01. Data represent means ± s.d. (n=6). (c) Survival percentage of the 4T1 tumor-bearing mice treated by surgery resection and PVAX-performed immunotherapy at the distant sites. (d) Average tumor growth curves of the distant tumors receiving different treatments at the distant sites, laser irradiation for 2 min at photodensity of 2.0 W/cm<sup>2</sup>. The mean tumor volumes were analyzed using one-way ANOVA. \*\*\* p < 0.01. Data represent means ± s.d. (n=6). (e) Tumor-free percentages of the distant tumor rechallenged mice.

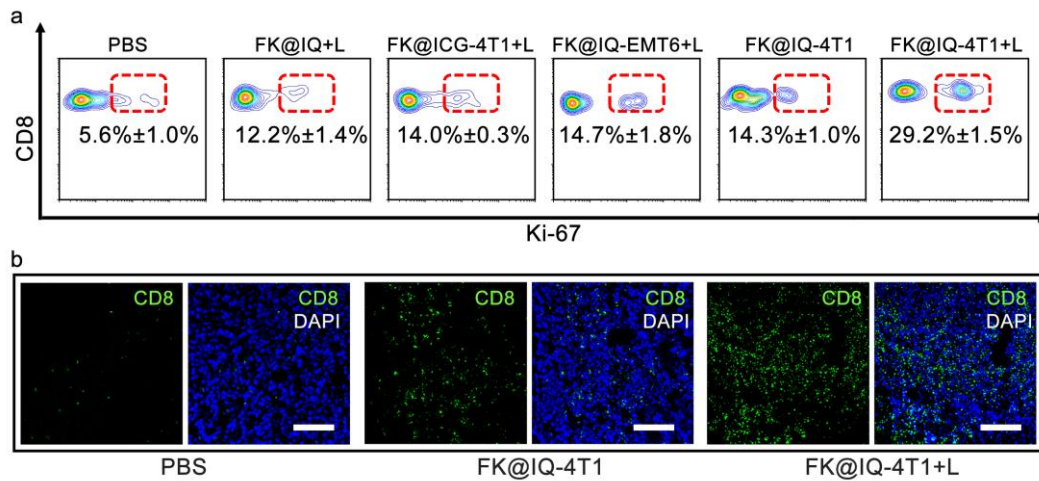

**Supplementary Figure 18. T lymphocyte infiltration in the recurrent tumors treated according to the schedule showed in Fig 4a.** (a) Proliferation activity of tumor infiltrating CD8<sup>+</sup> T cells in the recurrent 4T1 tumors after the indicated treatments. Data represent means ± s.d. (n=3). (b) Immunofluorescent examination of intratumoral infiltration of CD8<sup>+</sup> T cells in the recurrent 4T1 tumors examined at 3 days post the third treatment (Scale bars, 200 μm).

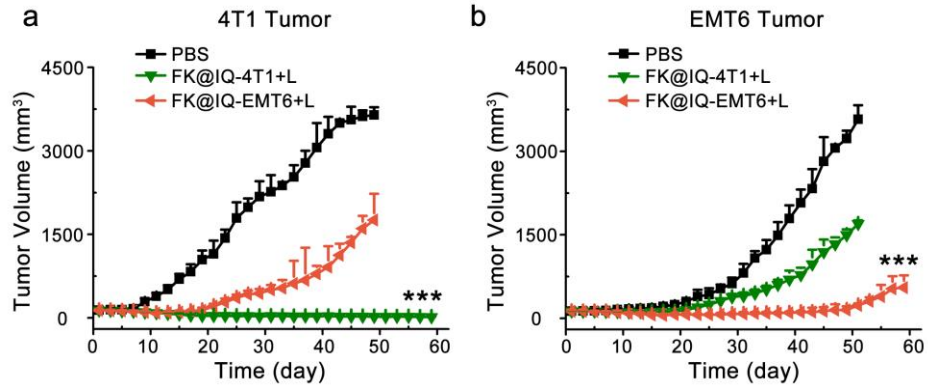

**Supplementary Figure 19. PVAX-performed immunotherapy of the primary tumors according to the treatment schedule shown in Fig 4a.** Tumor growth curves of (a) 4T1 and (b) EMT6 recurrent tumors upon different treatments (the treatment schedule was shown in Fig. 6a). The mean tumor volumes were analyzed using one-way ANOVA. \*\*\*  $p < 0.01$ . Data represent means  $\pm$  s.d. (n=6).

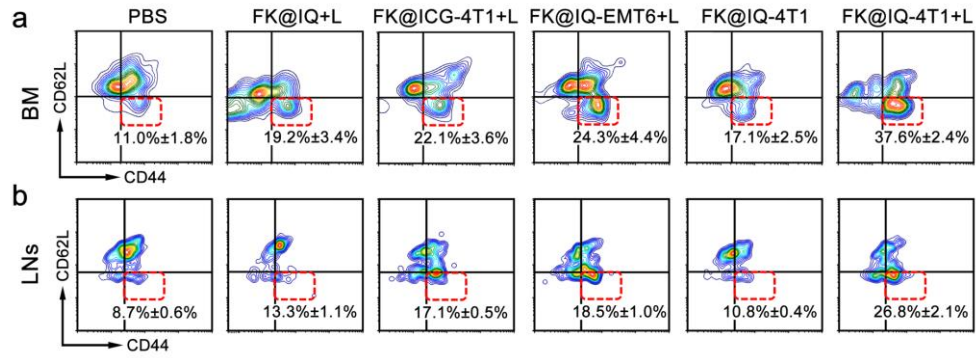

**Supplementary Figure 20. PVAX-induced long term immune memory effects.**

Flow cytometry plots and proportions of effector memory T cells in the (a) bone marrow, and (b) the lymph nodes (gated on CD8<sup>+</sup> CD11b<sup>+</sup>) examined at the same day for i.v. infusion of 4T1 cells. Data represent means ± s.d. (n=3).

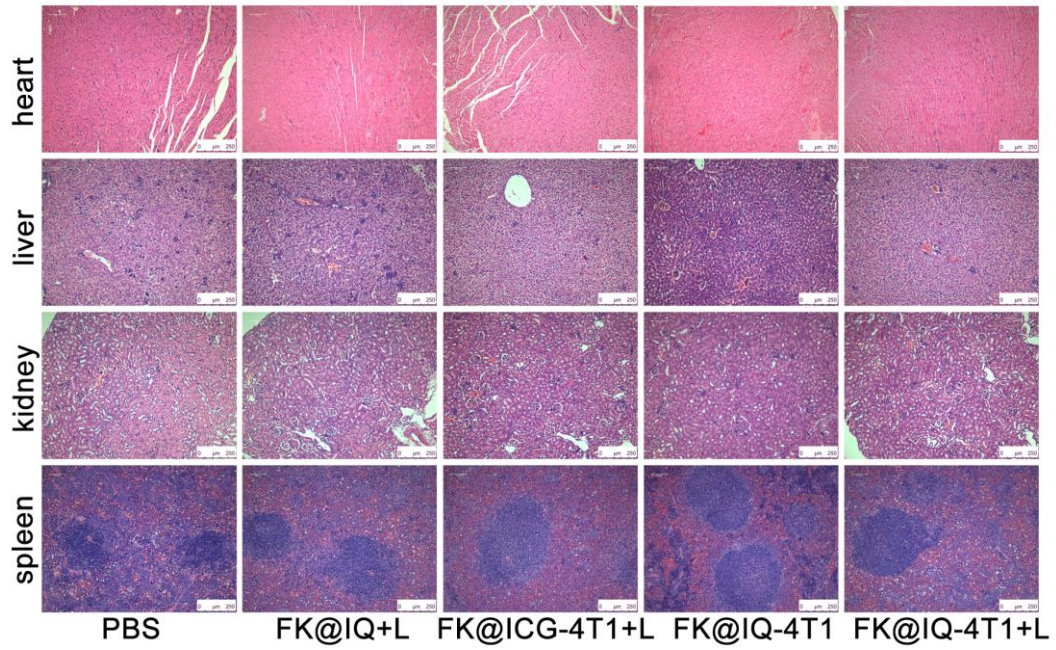

**Supplementary Figure 21.** H&E staining of the heart, liver, spleen and kidney of 4T1 tumor bearing mice examined at the end of anti-recurrence study using the autologous tumor model (The treatment schedule was shown in Fig. 7a, Scale bars = 200 μm).



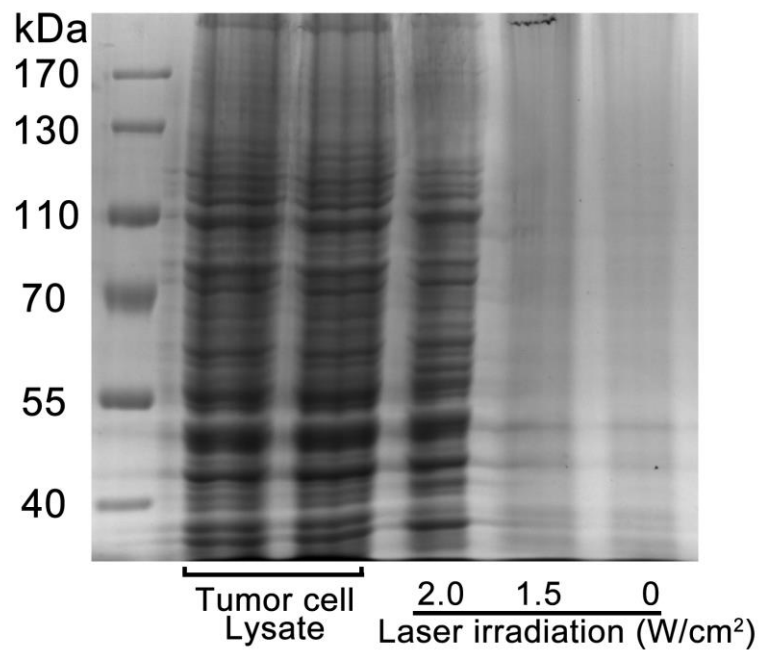

**Supplementary Figure 22.** The original SDS-PAGE gel for Fig.2f.
